# Supplementary material for: Hepatitis E and Allogeneic Hematopoietic Stem Cell Transplantation: A French Nationwide SFGM-TC Retrospective Study
Source: PubMed Central journal article supplement (PMC6669459; doi:10.3390/v11070622), 2019-07-05

## Supplementary table 1: Follow-up of patients diagnosed after alloH SCT

### Supplementary table 1A: Patients not treated

| Patient          | Time from Tx to testing | Time from Tx to HEV diagnosis | Time from HEV diagnosis |         |         |         |         |         |           |         |
|------------------|-------------------------|-------------------------------|-------------------------|---------|---------|---------|---------|---------|-----------|---------|
|                  |                         |                               | D+15                    | D+30    | D+45    | M3      | M6      | M9      | Last news |         |
| <b>2</b>         |                         | D+4177                        |                         |         |         |         |         |         |           | M+18    |
| <b>Blood NAT</b> | Nd                      | Pos                           |                         |         |         | Neg     | Neg     | Neg     |           | Neg     |
| <b>IgG/IgM</b>   | Nd                      | Pos/Pos                       |                         |         |         | Pos/Pos | Pos/Pos | Pos/Pos |           |         |
| <b>4</b>         |                         | D+2895                        |                         |         |         |         |         |         |           | M+20    |
| <b>Blood NAT</b> | Nd                      | Pos                           |                         |         | Neg     |         |         |         |           | Neg     |
| <b>IgG/IgM</b>   | Nd                      | Pos/Pos                       |                         |         | Pos/Pos |         |         |         |           | Pos/Pos |
| <b>5</b>         | D-15                    | D+187                         |                         |         |         |         |         |         |           |         |
| <b>Blood NAT</b> | Nd                      | 5.63                          |                         |         |         | Neg     | Neg     |         |           |         |
| <b>IgG/IgM</b>   | Neg/Neg                 |                               |                         |         |         | Pos/Pos | Pos/Neg |         |           |         |
| <b>6</b>         | D-30                    | D+615                         |                         |         |         |         |         |         |           |         |
| <b>Blood NAT</b> | Neg                     | 6.34                          | 3.37                    |         |         |         | Neg     |         |           |         |
| <b>IgG/IgM</b>   | Neg/Neg                 | Pos/Pos                       |                         |         |         |         | Pos/Pos |         |           |         |
| <b>8</b>         |                         | D+142                         |                         |         |         |         |         |         |           | M+22    |
| <b>Blood NAT</b> | Nd                      | Pos                           |                         |         |         | Neg     | Neg     |         |           | Neg     |
| <b>IgG/IgM</b>   | Nd                      | Pos/Pos                       |                         |         |         | Neg/Neg | Pos/Pos |         |           | Pos/Neg |
| <b>9</b>         |                         | D+148                         |                         |         |         |         |         |         |           |         |
| <b>Blood NAT</b> | Nd                      | Pos                           |                         | Neg     |         |         |         | Neg     |           |         |
| <b>IgG/IgM</b>   | Nd                      | Neg/Neg                       |                         | Neg/Neg |         |         | Neg/Neg | Neg/Neg |           |         |
| <b>11</b>        |                         | D+280                         |                         |         |         |         |         |         |           |         |
| <b>Blood NAT</b> | Nd                      | Pos                           | Pos                     |         | Pos     | Pos     | Pos     | Pos     | Neg       |         |
| <b>IgG/IgM</b>   | Nd                      | Nd                            | Nd                      |         | Nd/Pos  | Nd      | Nd      | Nd      | Nd        |         |
| <b>17</b>        | M-1                     | D+1028                        |                         |         |         |         |         |         |           |         |
| <b>Blood NAT</b> | Nd                      | 4.49                          | 2.83                    |         | Neg     | Neg     |         |         |           |         |
| <b>IgG/IgM</b>   | Neg/Neg                 | Pos/Pos                       |                         |         |         |         |         |         |           |         |
| <b>23</b>        |                         | D+78                          |                         |         |         |         |         |         |           |         |
| <b>Blood NAT</b> | Nd                      | Pos                           | Pos                     | Pos     | Pos     |         | Neg     | Neg     |           |         |
| <b>IgG/IgM</b>   | Nd                      | Nd                            |                         |         |         |         |         |         |           |         |

Abbreviations: Tx: transplantation; D: day; M: month; Pos: positive; NAT: nucleic acid testing; Nd: not done, Neg: negative. HEV NAT is indicated in log.

**Supplementary table 1B: Patients treated with ribavirin**

| Pat              | Time from Tx to testing | Time from Tx to HEV diagnosis | Time from HEV diagnosis to Ribavirin | Time from ribavirin initiation       |         |         |      |      |         |         |     |                      |         |         |           |  |
|------------------|-------------------------|-------------------------------|--------------------------------------|--------------------------------------|---------|---------|------|------|---------|---------|-----|----------------------|---------|---------|-----------|--|
|                  |                         |                               |                                      | D0                                   | D+15    | D+30    | D+45 | D+60 | M3      | M6      | M7  | M9                   | M12     | M14     | last news |  |
| <b>1</b>         | D+30                    | D+126                         | D+11                                 | Ribavirin: 175 d                     |         |         |      |      |         |         |     |                      |         |         |           |  |
| <b>Blood NAT</b> | Neg                     | 5.57                          |                                      | 3.5                                  |         |         |      |      | <1      | Neg     |     | Neg                  | Neg     |         |           |  |
| <b>IgG/IgM</b>   | Neg/Neg                 | Neg/Pos                       |                                      | Neg/Pos                              |         |         |      |      | Neg/Pos | Neg/Pos |     | Pos/Pos              | Pos/Neg |         |           |  |
| <b>3</b>         | D-60                    | D+287                         | D+14                                 | Ribavirin: 90 d (neutropenia)        |         |         |      |      |         |         |     |                      |         |         |           |  |
| <b>Blood NAT</b> | Nd                      | Pos                           |                                      | 5.9                                  | 2.5     | Neg     |      |      | Neg     |         |     |                      |         |         |           |  |
| <b>IgG/IgM</b>   | Neg/Neg                 | Neg/Pos                       |                                      | Neg/Pos                              | Neg/Pos | Neg/Pos |      |      | Pos/Pos |         |     |                      |         |         |           |  |
| <b>7</b>         |                         | D+1746                        | D+18                                 | Ribavirin: 44 d                      |         |         |      |      |         |         |     |                      |         |         |           |  |
| <b>Blood NAT</b> | Nd                      | Pos                           |                                      | Pos                                  |         |         | Nd   |      | Neg     |         |     |                      |         |         |           |  |
| <b>IgG/IgM</b>   | Nd                      | Nd                            |                                      | Nd                                   |         |         | Nd   |      | Pos/Pos |         |     |                      |         |         |           |  |
| <b>10</b>        | D+650                   | D+810                         | D+26                                 | Ribavirin: 60 d (erythroblastopenia) |         |         |      |      |         |         |     | Ribavirin: 11 months |         |         |           |  |
| <b>Blood NAT</b> | Neg                     | 5.4                           |                                      | 7.3                                  |         |         |      |      | 4.2     | Pos     |     | Neg                  | Neg     |         | M18       |  |
| <b>IgG/IgM</b>   | Nd/Neg                  |                               |                                      |                                      |         |         |      |      |         |         |     |                      |         |         | Neg       |  |
| <b>12</b>        |                         | D+386                         | D+47                                 | Ribavirin: 99 d                      |         |         |      |      |         |         |     |                      |         |         |           |  |
| <b>Blood NAT</b> | Nd                      | Pos                           |                                      | Pos                                  |         |         |      |      | Neg     | Neg     |     |                      | Neg     |         |           |  |
| <b>IgG/IgM</b>   | Nd                      | Pos/Pos                       |                                      |                                      |         |         |      |      |         |         |     |                      |         |         |           |  |
| <b>13</b>        | M-9                     | D+205                         | D+183                                | Ribavirin: 167 d                     |         |         |      |      |         |         |     |                      |         |         |           |  |
| <b>Blood NAT</b> | Pos                     | Pos                           |                                      | Pos                                  |         | Pos     |      |      | Pos     |         | Neg | Pos                  | Pos     | Pos     | M20       |  |
| <b>IgG/IgM</b>   | Pos/Pos                 | Neg/Pos                       |                                      |                                      |         |         |      |      |         |         |     |                      |         | Pos/Pos | Neg       |  |
| <b>14</b>        | M-1                     | D+386                         | D+36                                 | Ribavirin: 60 d (pancytopenia)       |         |         |      |      |         |         |     |                      |         |         |           |  |
| <b>Blood NAT</b> | Pos                     | Pos                           |                                      | 8                                    | 6.2     |         | 2    | Neg  |         |         |     |                      |         |         |           |  |

|                  |         |         |       |                  |      |      |     |         |         |  |  |  |         |         |
|------------------|---------|---------|-------|------------------|------|------|-----|---------|---------|--|--|--|---------|---------|
| <b>IgG/IgM</b>   | Neg/Neg | Neg/Neg |       |                  |      |      |     | Neg/Neg |         |  |  |  |         |         |
| <b>15</b>        | M-1     | D+368   | D+3   | Ribavirin: 52 d  |      |      |     |         |         |  |  |  |         |         |
| <b>Blood NAT</b> | Neg     | 6.63    |       | 6.63             | 2.42 |      | Neg |         |         |  |  |  |         |         |
| <b>IgG/IgM</b>   | Pos/Q   | Nd      |       |                  |      |      |     |         |         |  |  |  |         |         |
| <b>16</b>        | M-1     | D+98    | D+5   | Ribavirin: 345d  |      |      |     |         |         |  |  |  |         |         |
| <b>Blood NAT</b> | Nd      | 7.83    |       | 7.83             | 3.15 | 2.92 | Neg |         | Neg     |  |  |  | Neg     | Neg     |
| <b>IgG/IgM</b>   | Neg/Neg | Neg/Neg |       | Neg/Neg          |      |      |     |         |         |  |  |  | Pos/Neg | Neg/Neg |
| <b>21</b>        | M-1     | D+26    | D+1   | Ribavirin: 107 d |      |      |     |         |         |  |  |  |         |         |
| <b>Blood NAT</b> | Neg     | 5.43    |       | 5.62             | 3.43 | Neg  | Neg | Neg     | Neg     |  |  |  |         |         |
| <b>IgG/IgM</b>   | Neg/Neg | Neg/Neg |       |                  |      |      |     |         |         |  |  |  |         |         |
| <b>22</b>        |         | D+120   | D+229 | Ribavirin: 97 d  |      |      |     |         |         |  |  |  |         |         |
| <b>Blood NAT</b> | Nd      | Pos     |       | Pos              |      | Neg  |     | Neg     | Neg     |  |  |  |         |         |
| <b>IgG/IgM</b>   | Nd      |         |       |                  |      |      |     |         |         |  |  |  |         |         |
| <b>24</b>        | D-21    | D+52    | D+10  | Ribavirin: 92 d  |      |      |     |         |         |  |  |  |         |         |
| <b>Blood NAT</b> | 5.97    | 8.43    |       | 8.43             |      |      |     |         | Neg     |  |  |  |         |         |
| <b>IgG/IgM</b>   | Nd/Nd   | Neg/Neg |       | Neg/Neg          |      |      |     |         | Pos/Pos |  |  |  |         |         |
| <b>25</b>        |         | D+1926  | D+23  | Ribavirin: 90 d  |      |      |     |         |         |  |  |  |         |         |
| <b>Blood NAT</b> | Nd      | 5       |       |                  |      | Neg  |     |         |         |  |  |  |         |         |
| <b>IgG/IgM</b>   | Nd      | Neg/Neg |       |                  |      |      |     |         |         |  |  |  |         |         |

Abbreviations: D: days; NAT: nucleic acid testing; Neg: negative; Nd: not done; Pat: patient; Pos: positive; Q: questionable; Tx: transplantation.

HEV NAT is indicated in log

## **Supplementary figures legends**

### **SFig1. HEV infection cases diagnosed before alloHSCT**

Days are indicated from transplantation

### **SFig2. HEV infection recurrence after immunosuppressive treatment for graft-versus-host-disease**

Days are indicated from transplantation

**SFig1. HEV infection cases diagnosed before alloHSCT**

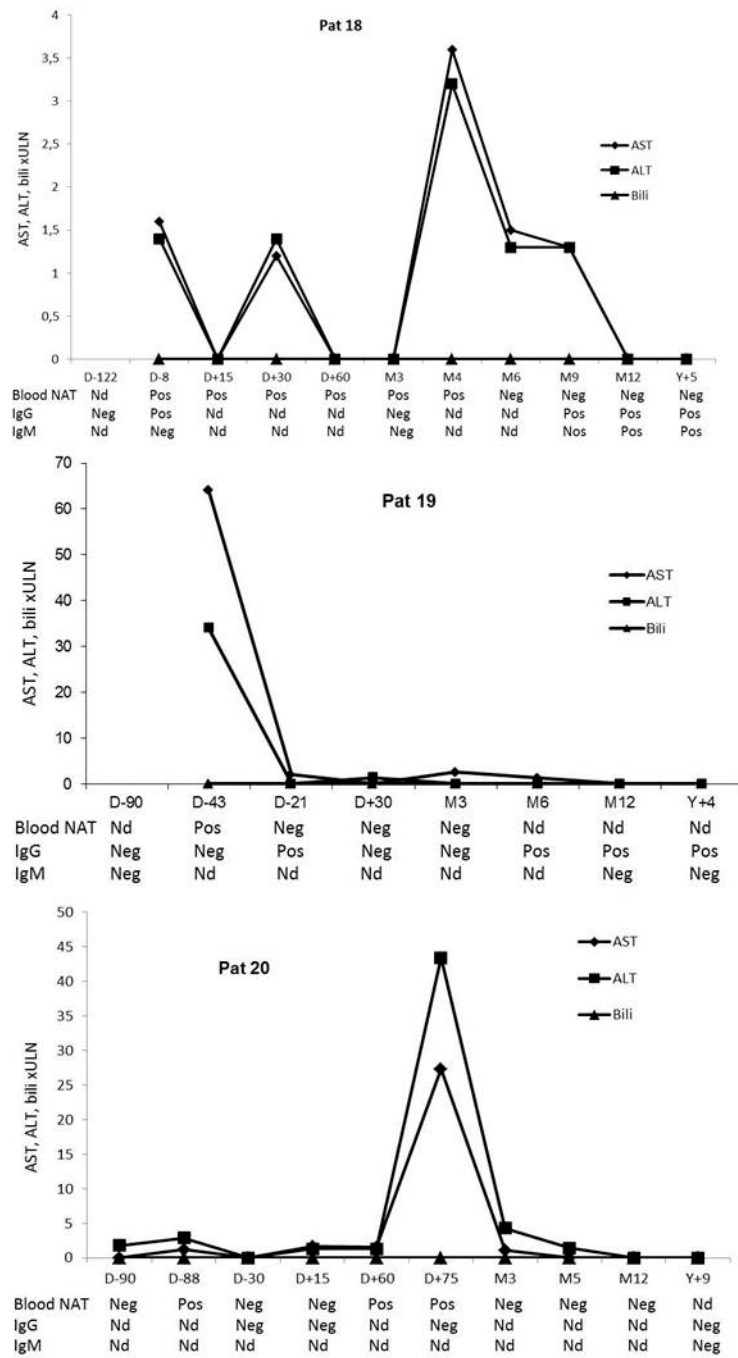

**SFig2. HEV infection recurrence after immunosuppressive treatment for graft-versus-host-disease**

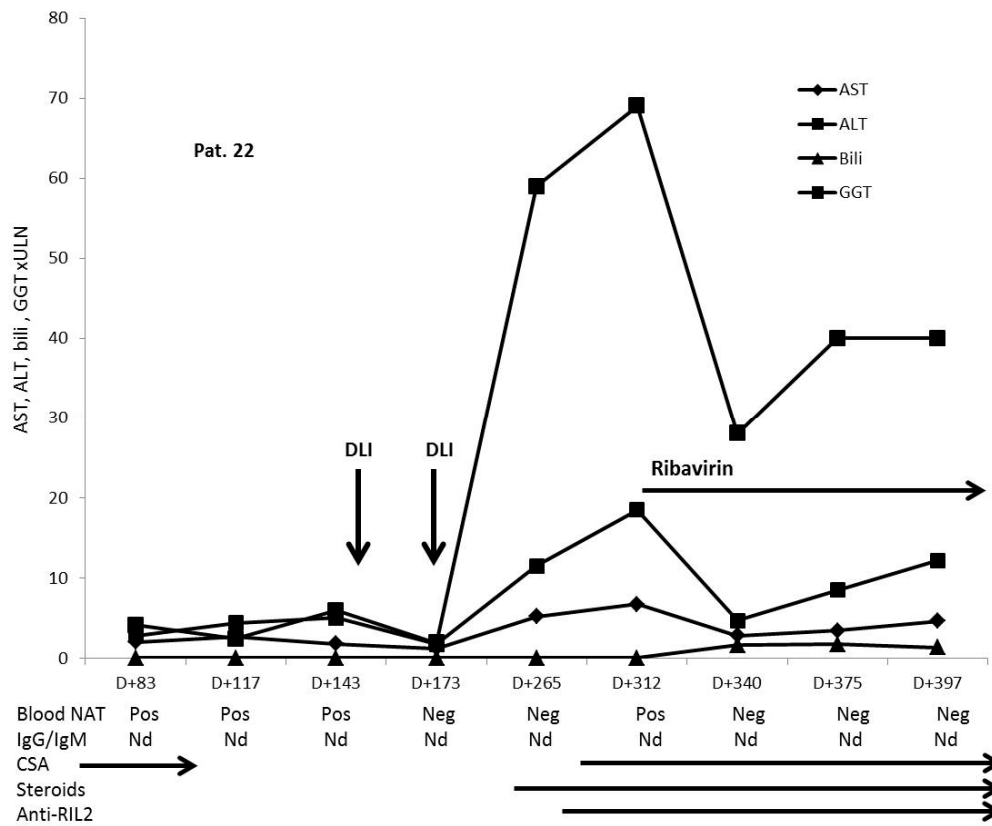

Supplement: viruses-11-00622-s001.pdf [file viruses-11-00622-s001.pdf]
